# Supplementary material for: Optimization and utilization of single chain metallocatanionic vesicles for antibacterial photodynamic therapy (aPDT) againstE. coli
Source: Royal Society of Chemistry journal article supplement (doi:10.1039/d0tb01551b), 2020-01-01
Supplement: d0tb01551b1.pdf [file d0tb01551b1.pdf]

## Supplementary Information

### Optimization and utilization of single chain metallocatanionic vesicles for antibacterial Photodynamic therapy (aPDT) against *E. coli*

Bunty Sharma, Gurpreet Kaur\* and Ganga Ram Chaudhary\*

Department of Chemistry and Centre of Advanced Studies in Chemistry, Panjab University,  
Chandigarh

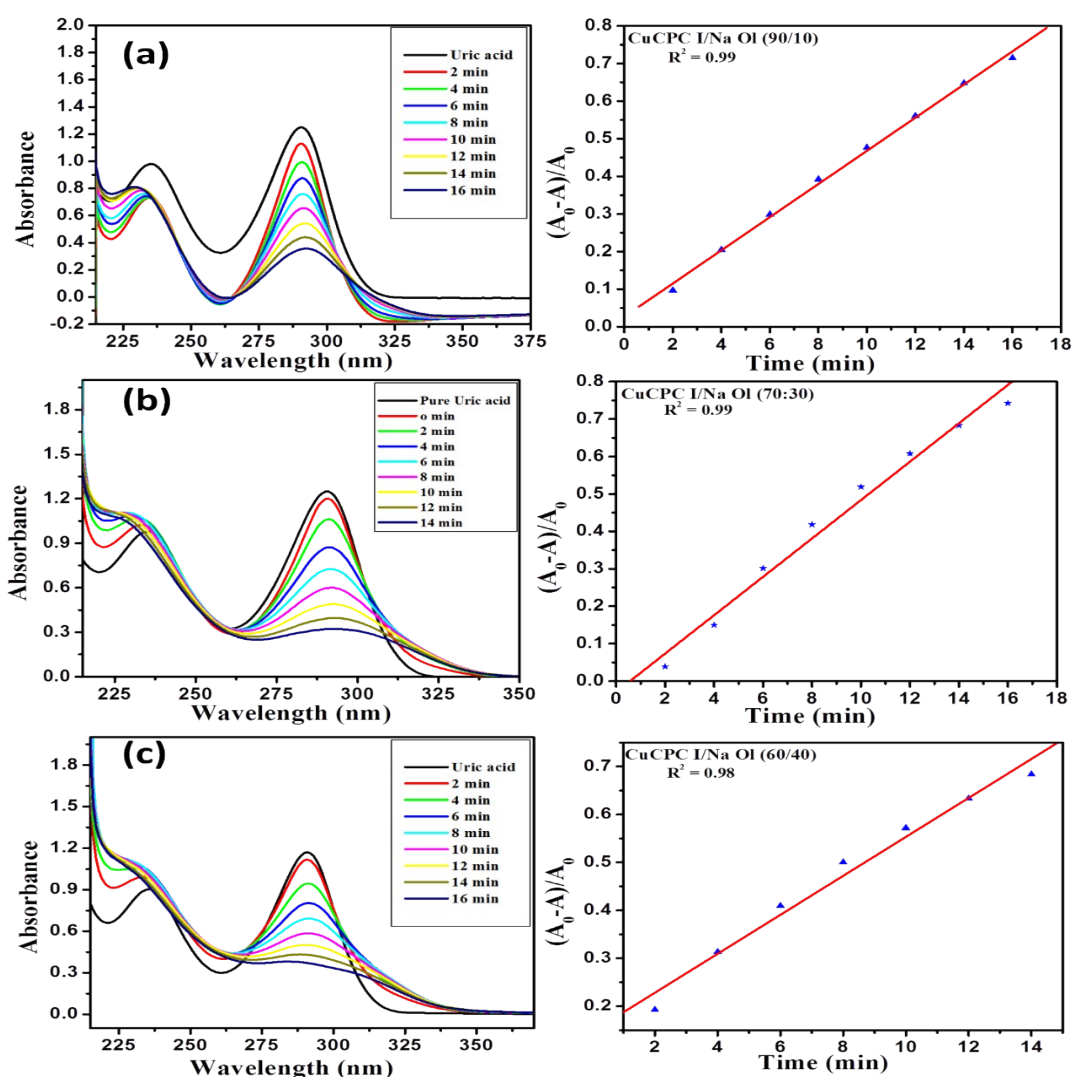

**Figure S1:** Quenching of UA in presence of (a) MB with CuCPC I/Na Ol (90/10), (b) MB with CuCPC I/Na Ol (70/30) and (c) MB with CuCPC I/Na Ol (60/40) mixture

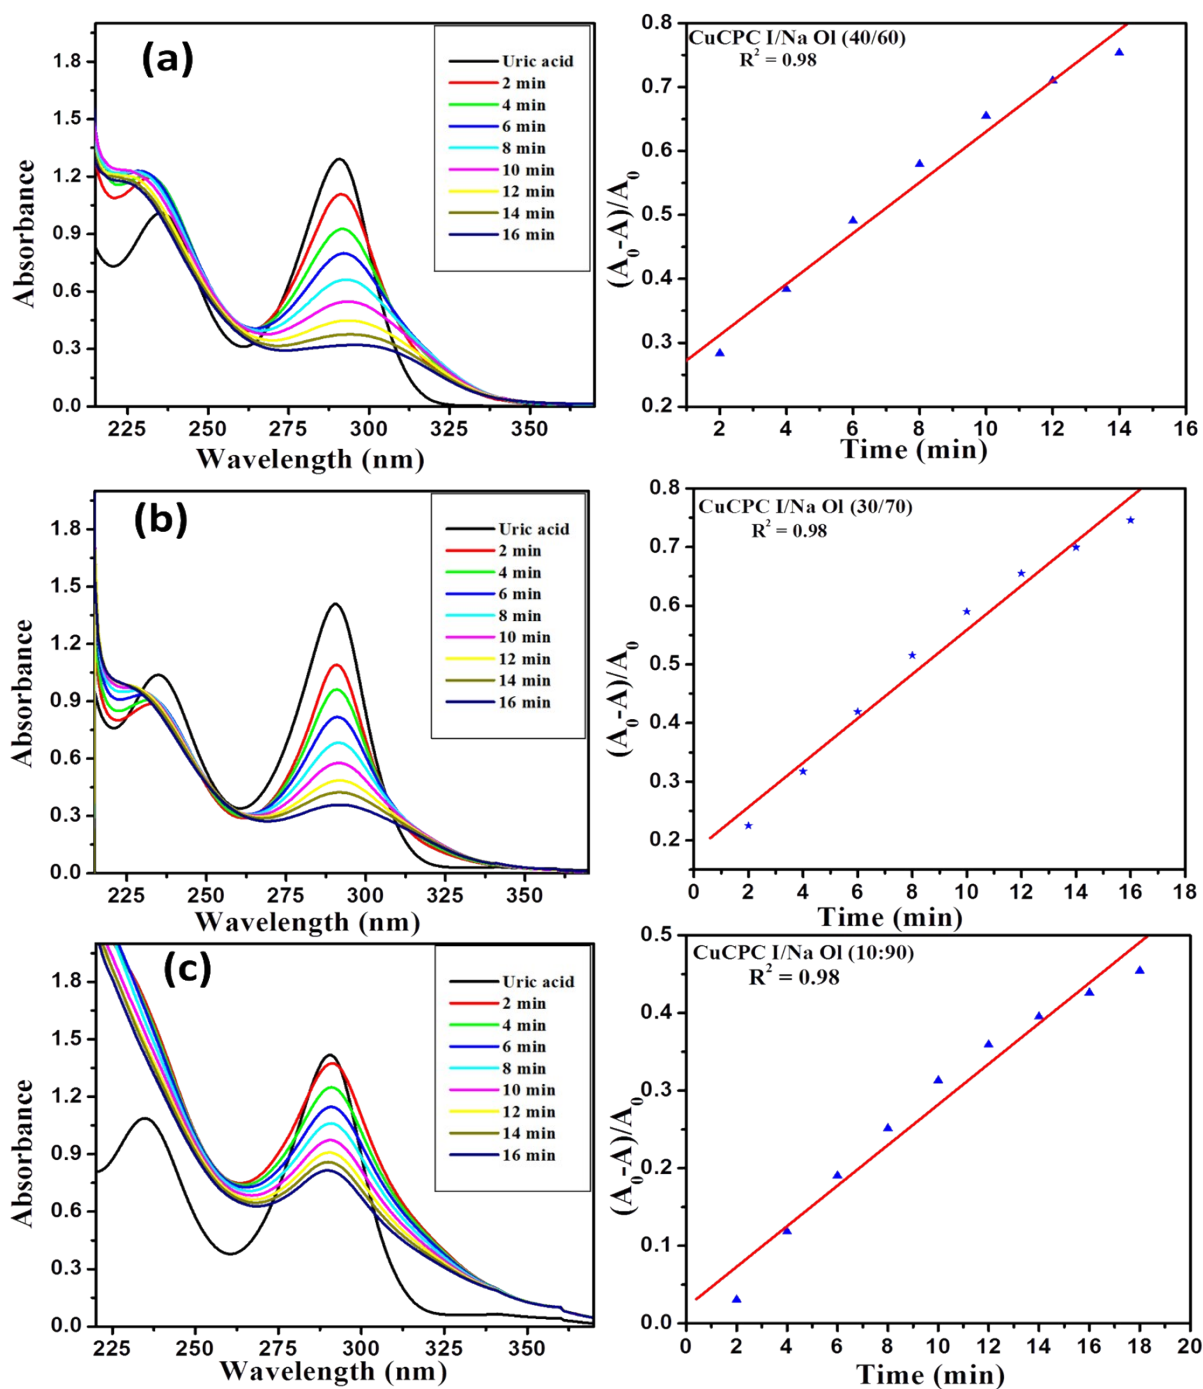

**Figure S2:** Quenching of UA in presence of (a) MB with CuCPC I/Na Ol (40/60), (b) MB with CuCPC I/Na Ol (30/70) and (c) MB with CuCPC I/Na Ol (10/90) mixture
